# Supplementary material
Source: PubMed Central journal article supplement (PMC6800653)
Supplement: NIHMS1539241-supplement-1.pdf [file NIHMS1539241-supplement-1.pdf]

## Supplementary material

| Genotype                      | Frequency<br>(Hz) | Amplitude<br>(pA) | Rise time<br>(ms) | Decay time<br>(ms) |
|-------------------------------|-------------------|-------------------|-------------------|--------------------|
| <b>sIPSCs</b>                 |                   |                   |                   |                    |
| IL-6 tg <sup>-/-</sup> (n=8)  | 2.1 ± 0.6         | 57.9 ± 4.1        | 2.6 ± 0.2         | 6.8 ± 0.6          |
| IL-6 tg <sup>+/-</sup> (n=11) | 1.6 ± 0.3         | 63.2 ± 4.8        | 2.9 ± 0.1         | 8.5 ± 0.7          |
| IL-6 tg <sup>+/+</sup> (n=19) | 2.0 ± 0.3         | 77.8 ± 4.9 (*)    | 2.7 ± 0.1         | 7.0 ± 0.9          |
| <b>mIPSCs</b>                 |                   |                   |                   |                    |
| IL-6 tg <sup>-/-</sup> (n=15) | 0.8 ± 0.1         | 57.0 ± 2.8        | 2.6 ± 0.1         | 7.6 ± 0.5          |
| IL-6 tg <sup>+/-</sup> (n=16) | 0.9 ± 0.1         | 61.9 ± 3.6 (*)    | 2.5 ± 0.1         | 6.6 ± 0.6          |
| IL-6 tg <sup>+/+</sup> (n=17) | 0.8 ± 0.1         | 78.4 ± 5.8 (*,#)  | 2.5 ± 0.1         | 7.3 ± 0.6          |

Supplementary Table 1. Summary of sIPSC and mIPSC characteristics from CeA neurons from IL-6 tg<sup>-/-</sup>, IL-6 tg<sup>+/-</sup> and IL-6 tg<sup>+/+</sup> mice. Data are represented as means ± S.E.M. n indicates the number of cells. Statistical differences between the groups were calculated using one-way ANOVA followed by a post-hoc mean comparison (Tukey's). For post-hoc group comparisons: \* = significant difference for IL-6 tg<sup>-/-</sup> vs. IL-6 tg<sup>+/+</sup>; # = significant difference for IL-6 tg<sup>+/-</sup> vs IL-6 tg<sup>+/+</sup> mice.

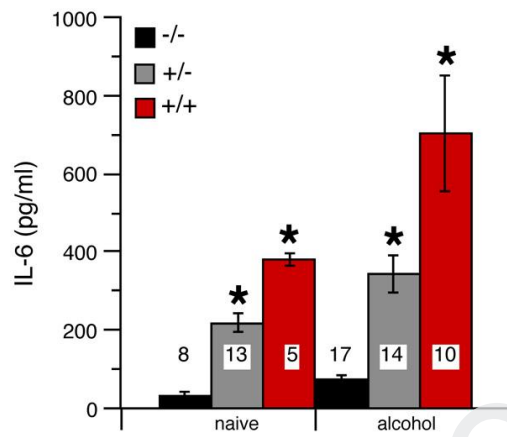

Supplementary Figure 1. IL-6 levels in the cerebellum from alcohol naïve and acute alcohol exposed IL-6 tg  $+/+$ , IL-6 tg  $+/-$  and IL-6  $-/-$  mice. \* = Significantly different from IL-6 tg  $-/-$  mice.
